# Supplementary material for: Graphene oxide-supported highly porous TiO2 nanoleaflets for the ultrafast adsorption and photochemical decomposition of 2,4,6-trinitrotolune in water
Source: Royal Society of Chemistry journal article supplement (doi:10.1039/d2nj02399g), 2022-01-01
Supplement: d2nj02399g1.pdf [file d2nj02399g1.pdf]

## Supplementary file

### Graphene oxide supported highly porous TiO<sub>2</sub> nano leaflets for ultrafast adsorption and photochemical decomposition of 2,4,6-trinitrotoluene from water

Pradeep Kumar, Bharti\*, Pankaj Kumar Sharma, Pramod Kumar Rai

Environment Safety Group, Centre for Fire, Explosive and Environment Safety (CFEES), Brig.

S. K. Mazumdar Road, Timarpur, Delhi-110054, India

Tel: +91 11 23907203 Fax: +91 11 23819547

\*Author for correspondence: [bharti\\_2006@rediffmail.com](mailto:bharti_2006@rediffmail.com).

Journal: New Journal of chemistry

---

#### 1. Synthesis of reduced Graphene Oxide (rGO) Nanosheets:

Graphite oxide (GO) was synthesized using a modified Hummers' process<sup>1</sup> with some modifications. Graphite (G) powder (6 g) was treated with a mixture of 98% concentrated sulphuric acid (130 mL) and 70% concentrated nitric acid (6 mL) in a round bottom flask under continuous magnetic stirring in an ice bath. The temperature of the solution was maintained below 5 °C for 5 hours. Eighteen grams of potassium permanganate (KMnO<sub>4</sub>) was added gradually maintaining the temperature of solution. After complete addition of KMnO<sub>4</sub>, the solution was continuously stirred for 24 h at room temperature. Then, distilled water (140 mL) was added to the above mixture and the temperature of the solution was maintained below 80 °C. After 15 min, the above mixture was diluted with 450 mL of distilled water and filtered. Two hundred milliliters of 20% HNO<sub>3</sub> was added and heated to 80 °C for 30 min. The resulting suspension was washed and centrifuged at 4000 rpm repeatedly till the pH of the solution reached ~ 7. The product was dried in an

oven at 60 °C for 8 h. The synthesized graphite oxide was exfoliated to reduced graphene oxide nanosheets (rGO) by heat treatment at 300 °C under atmospheric pressure.

## 2. BET and BJH analysis:

Two stages are involved in the application of the BET method.<sup>2</sup> First, it is necessary to transform a physisorption isotherm into the ‘BET plot’ and from it derive a value of the BET monolayer capacity,  $n_m$ . In the second stage, the BET-area,  $A_s$  (BET), is calculated from  $n_m$  by adopting an appropriate value of the molecular cross-sectional area,  $\sigma$ . The BET equation in the linear form

(1)

$$\frac{p/p^0}{n(1-p/p^0)} = \frac{1}{n_m C} + \frac{C-1}{n_m C} \left( \frac{p}{p^0} \right) \quad (1)$$

where  $p$  is the equilibrium pressure of the adsorbed gas;  $p^0$  is the saturated vapor pressure of the adsorbed gas;  $V$  is the actual (multi-layer) adsorption amount of the sample,  $\text{cm}^3/\text{g}$ ;  $V_m$  is the single-layer saturated adsorption amount per unit sandstone mass,  $\text{cm}^3/\text{g}$ ;  $C$  is the constant reflecting the adsorption heat.

$$A_s = \left( \frac{V_m N a_m}{22400} \right) 10^{-1} \quad (2)$$

The specific surface area is shown in the above (**Equation 2**): where  $A_s$  is the multi-point BET-specific surface area,  $\text{m}^2/\text{g}$ ;  $V_m$  is as described above;  $N$  is Avogadro's constant,  $6.022 \times 10^{23}$ ;  $a_m$  is the cross-sectional area of a single nitrogen molecule, the adsorption layer is a hexagonal close-packed structure, the nitrogen molecules are considered spherical, at 77.3 K.

The pore size distribution of the low-temperature nitrogen adsorption method is usually calculated by the BJH method based on the Kelvin equation (**equation 3**).<sup>3</sup>

$$\ln \frac{p}{p^o} = -2\gamma \frac{v \cos \theta}{r_k RT} \quad (3)$$

where  $p/p^o$  is the equilibrium pressure over the saturated vapor pressure of the adsorbed gas;  $\tilde{v}$  is the mole volume of the liquid nitrogen;  $\gamma$  is the interfacial tension of the liquid nitrogen.

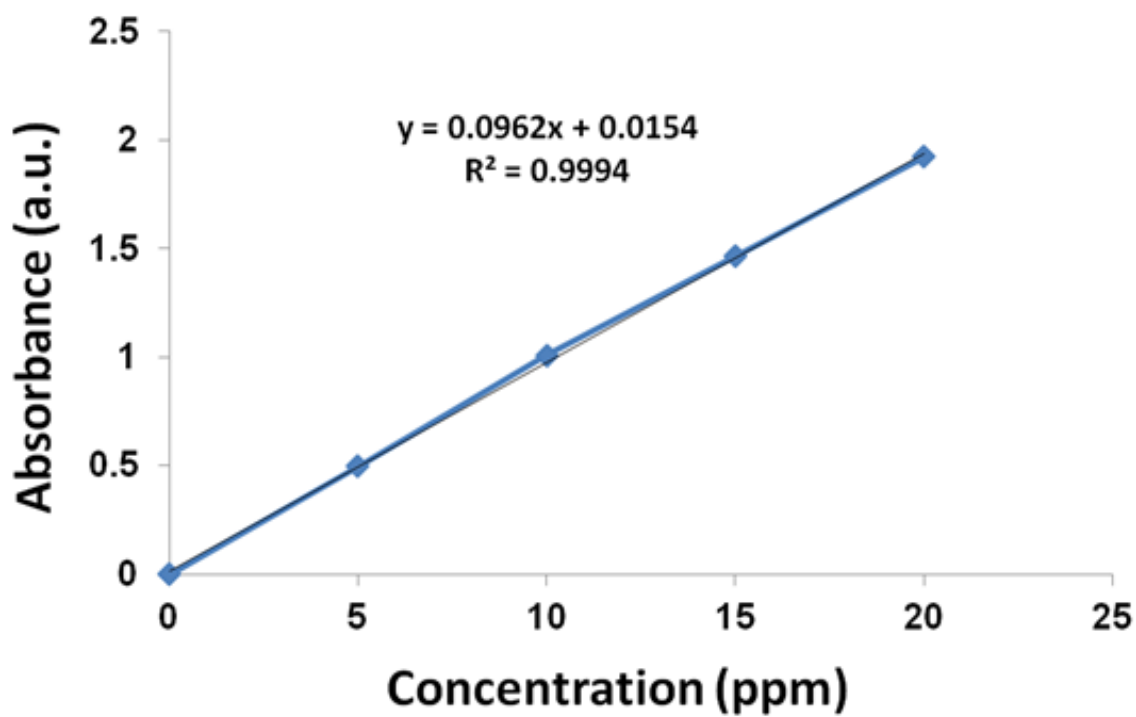

**Fig. S1.** Calibration curve for 2,4,6-trinitrotoluene.

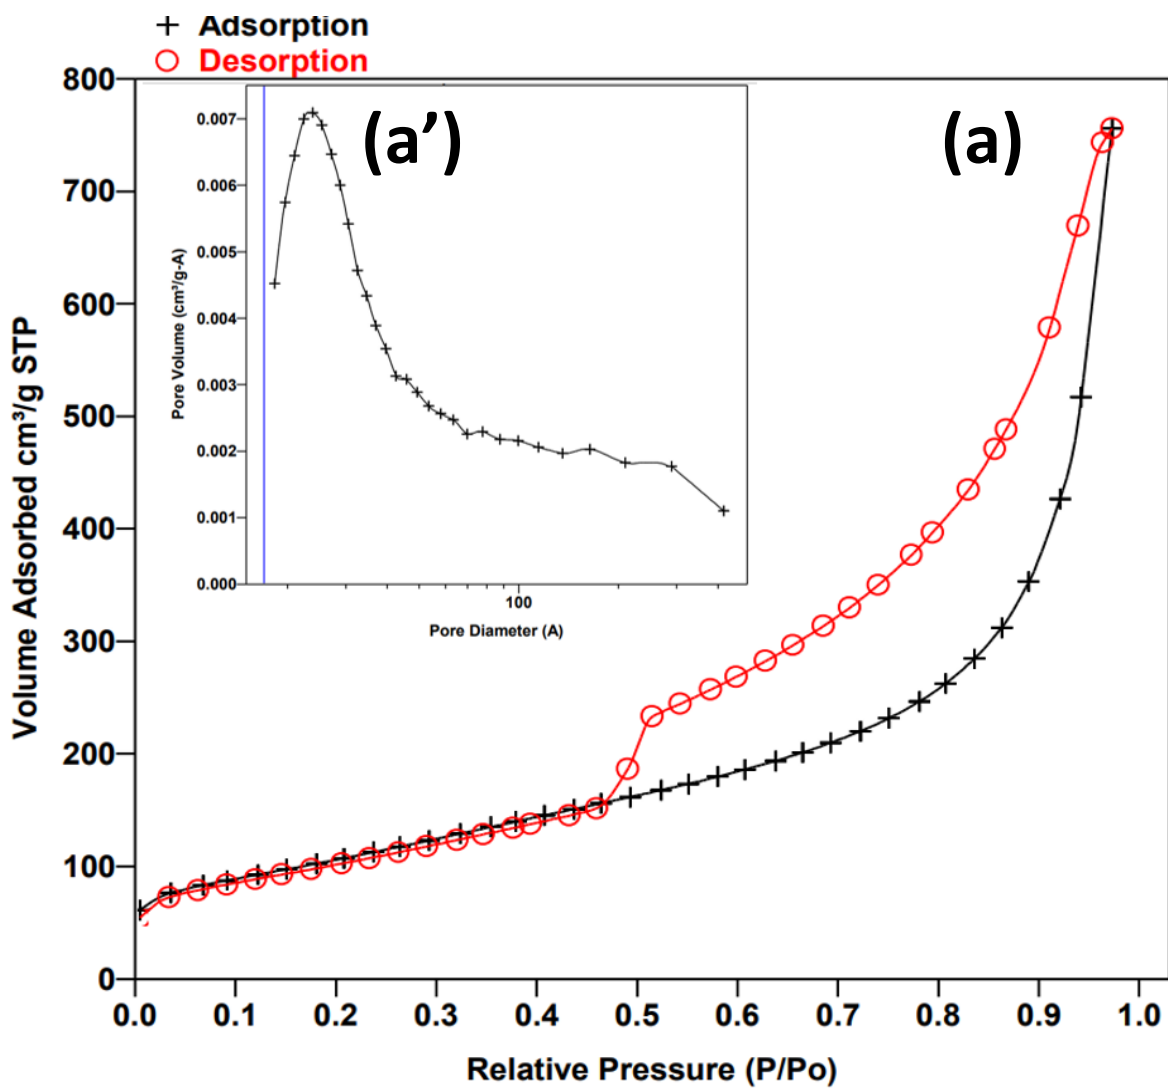

Fig. S2a. (a) BET adsorption isotherm and inset (a') BJH pore distribution curve of rGO

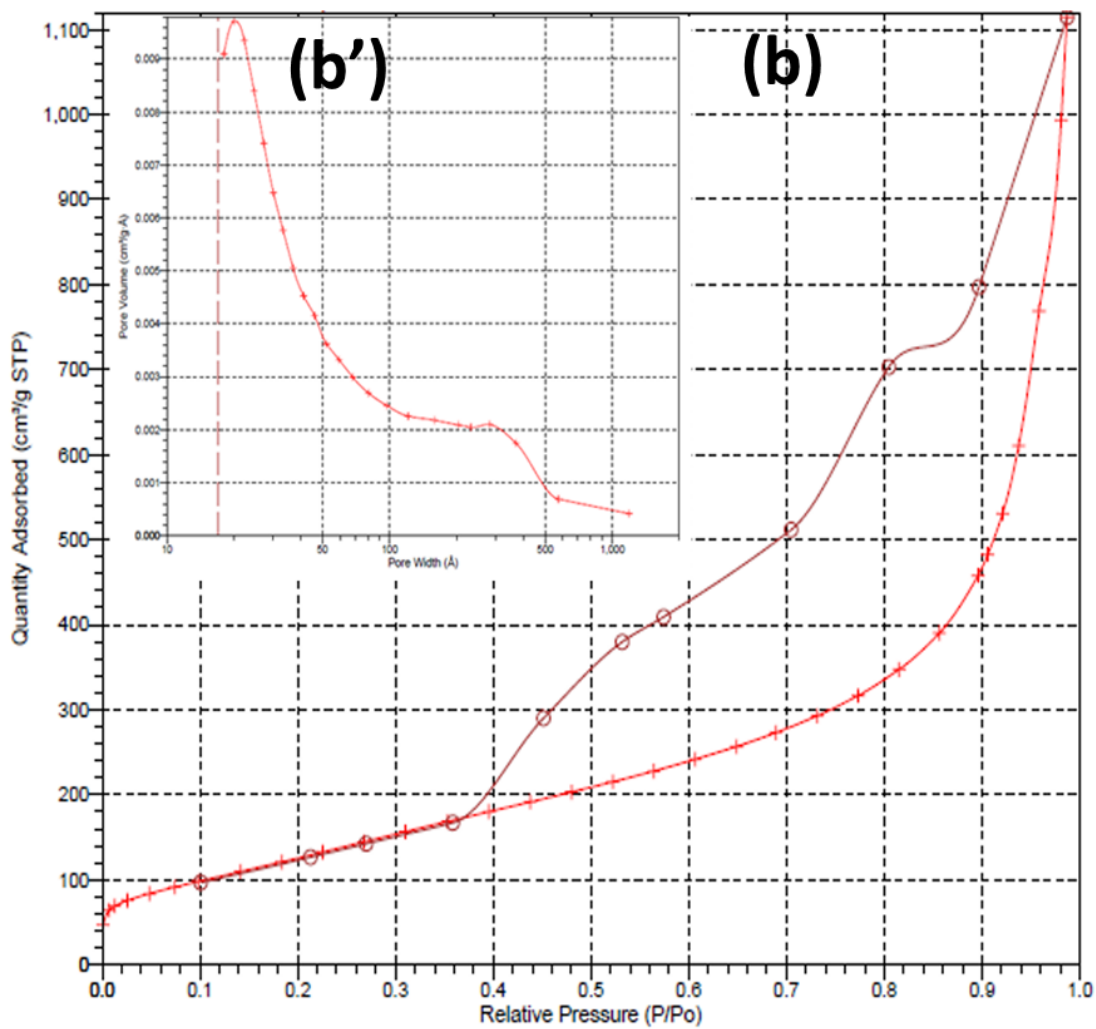

**Fig. S2.b.** (b) BET adsorption isotherm and inset (b') BJH pore distribution curve of TGO

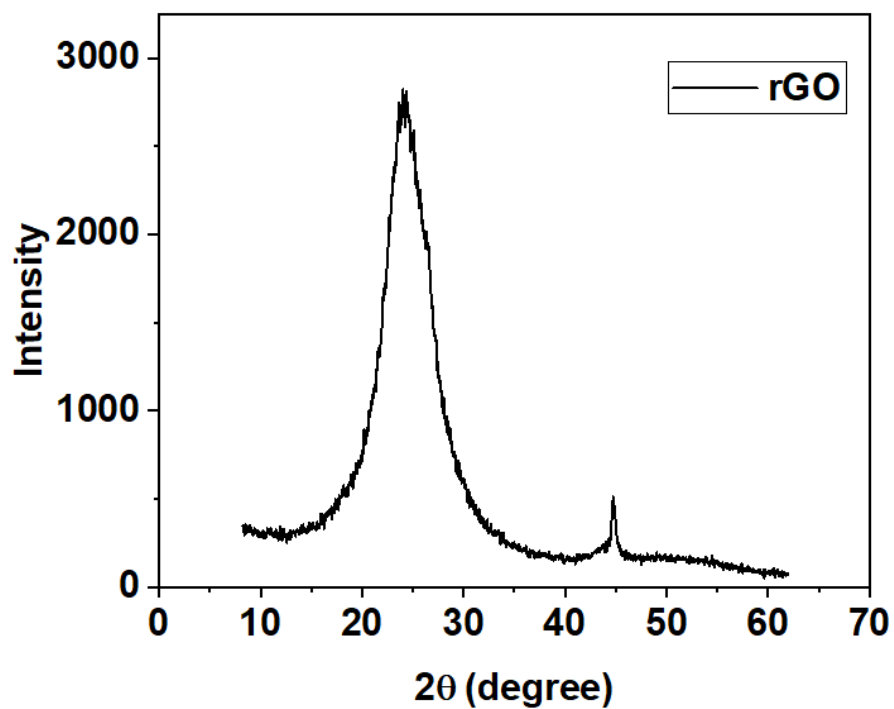

**Fig. S3.** X-Ray Diffraction of reduced graphene oxide (rGO)

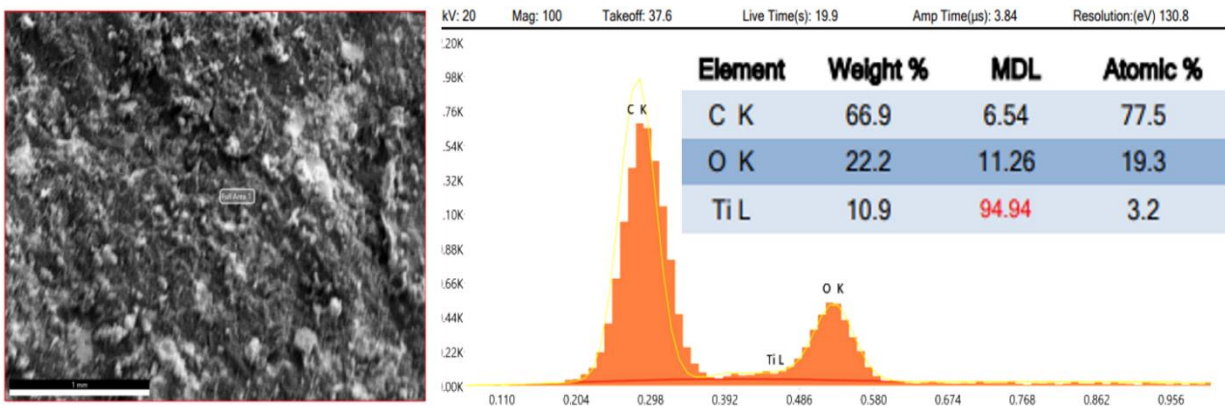

**Fig S4.** EDAX analysis of TGO

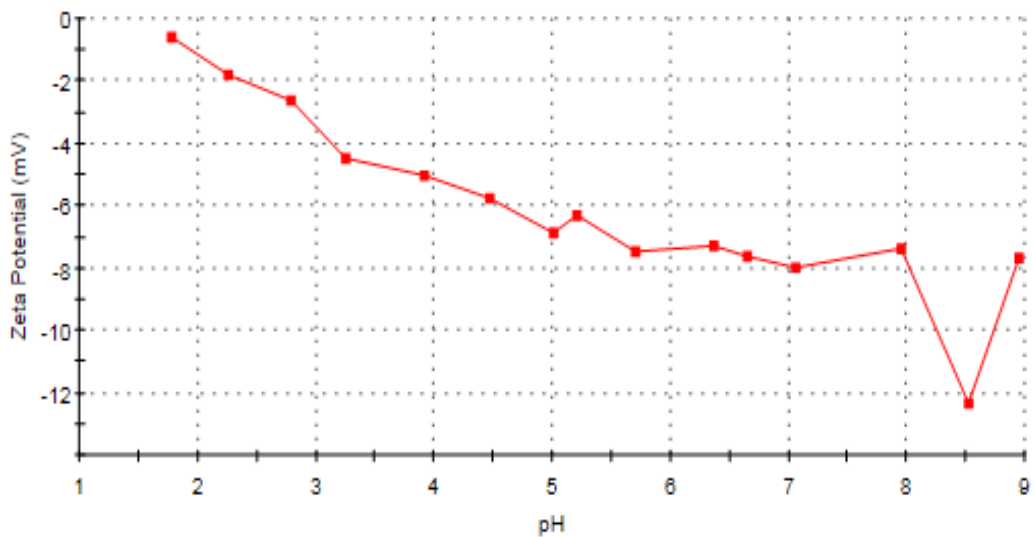

**Fig. S5a.** Zetapotential plot for reduced graphene oxide (rGO)

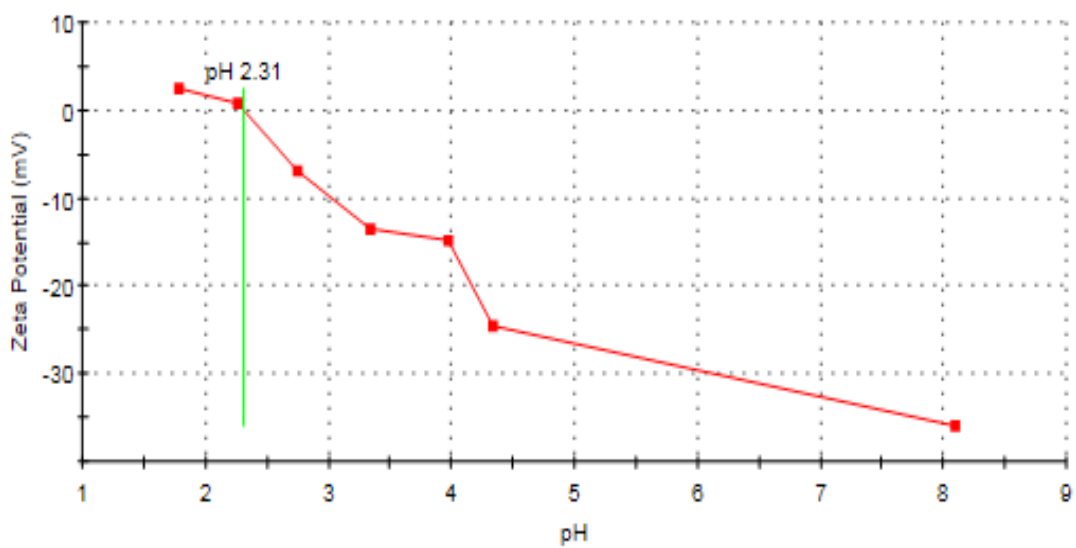

**Fig. S5b.** Zetapotential plot for TGO

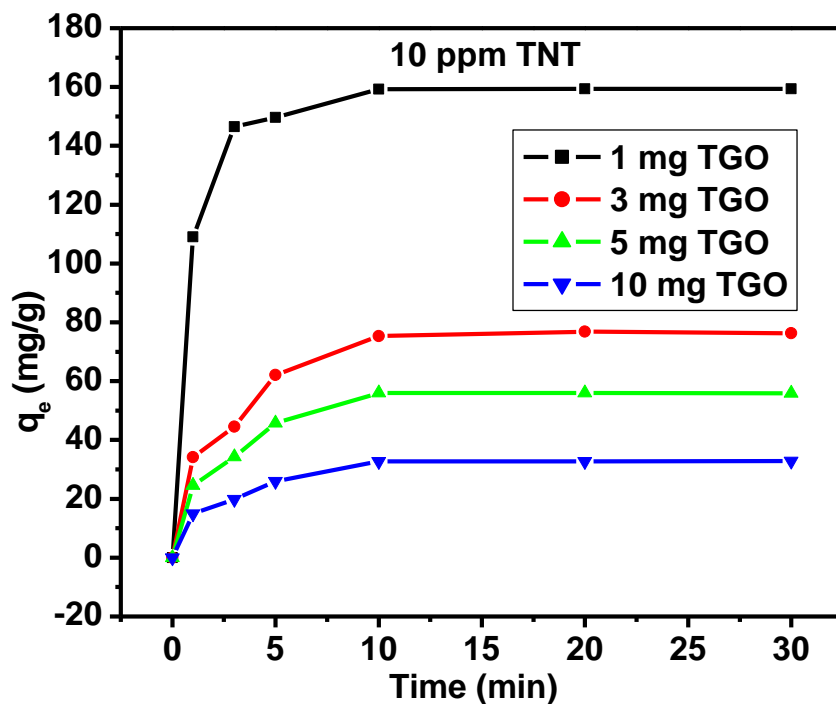

**Fig. S6:** Effect of doses of composite (TGO) for removal of 2,4,6-Trinitrotoluene (TNT).

References:

- 1 S. Hummers, R. E. Offeman, Preparation of graphitic oxide. *Journal of the American Chemical Society*, 1958, **80**, 1339.
- 2 M. Thommes, K. Kaneko, A. V. Neimark, J. P. Olivier, F. Rodriguez-Reinoso, J. Rouquerol, K. S. W. Sing, Physisorption of gases, with special reference to the evaluation of surface area and pore size distribution. (IUPAC Technical Report). *Pure Appl. Chem.*, 2015, **87**, 1051–1069.
- 3 E. P. Barrett, L.G. Joyner, P.P. Halenda, The determination of pore volume and area distributions in porous substances. I. Computations from nitrogen isotherms. *J Am Chem Soc.* 1951, **73**, 373-380.
